# Supplementary material for: Genomic and transcriptomic analyses of the tangerine pathotype of Alternaria alternata in response to oxidative stress
Source: PubMed Central journal article supplement (PMC5007530; doi:10.1038/srep32437), 2016-09-01
Supplement: srep32437-s1.pdf [file srep32437-s1.pdf]

**Genomic and transcriptomic analyses of the tangerine pathotype of *Alternaria alternata* in response to oxidative stress**

**Mingshuang Wang<sup>1</sup>, Xuepeng Sun<sup>2</sup>, Dongliang Yu<sup>3</sup>, Jianping Xu<sup>4</sup>, Kuangren Chung<sup>5</sup> and Hongye**

**Li<sup>1\*</sup>**

<sup>1</sup>Institute of Biotechnology, Zhejiang University, Hangzhou 310058, China;

<sup>2</sup>Boyce Thompson Institute, Cornell University, Ithaca 14850, USA;

<sup>3</sup>College of Life and Environmental Sciences, Hangzhou Normal University, Hangzhou 310018, China;

<sup>4</sup>Department of Biology, McMaster University, Hamilton, Ontario L8S 4K1, Canada;

<sup>5</sup>Department of Plant Pathology, National Chung-Hsing University, Taichung 40227, Taiwan

**\*Corresponding authors:** Hongye Li

E-mail address: [hyli@zju.edu.cn](mailto:hyli@zju.edu.cn)(H. Li)

## Supplementary figures and tables

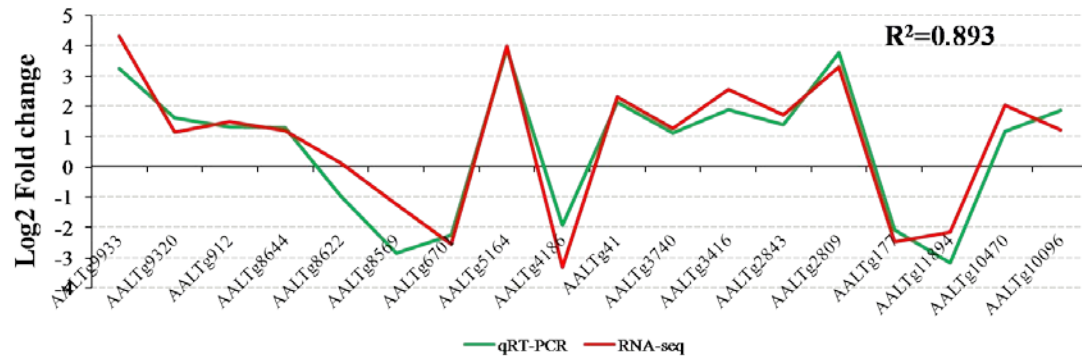

Supplementary Fig. S1 Validation of the RNA-seq data using qRT-PCR.

Supplementary Table S1 Genome structures of *Alternaria* species in terms of gene density.

| Species                                   | Coding genes | Genome size | Gene density |
|-------------------------------------------|--------------|-------------|--------------|
| <i>Alternaria_alternata</i> _ATCC11680    | 11946        | 33752310    | 354          |
| <i>Alternaria_alternata</i> _ATCC66891    | 11756        | 33236566    | 354          |
| <i>Alternaria_alternata</i> _ATCC66982    | 11795        | 33465085    | 352          |
| <i>Alternaria_alternata</i> _Z7           | 12049        | 34361435    | 351          |
| <i>Alternaria_arborescens</i> _EGS128     | 11815        | 33889384    | 349          |
| <i>Alternaria_brassicicola</i> _ATCC96836 | 10206        | 30291099    | 337          |
| <i>Alternaria_capsici</i> _BMP0180        | 10974        | 33957558    | 323          |
| <i>Alternaria_carthami</i> _BMP1963       | 11657        | 34455417    | 338          |
| <i>Alternaria_citriarbusti</i> _BMP2343   | 12060        | 34124852    | 353          |
| <i>Alternaria_crassa</i> _BMP0172         | 11128        | 35027983    | 318          |
| <i>Alternaria_dauci</i> _BMP0167          | 11241        | 32148253    | 350          |
| <i>Alternaria_destruens</i> _BMP0317      | 11331        | 41834136    | 271          |
| <i>Alternaria_fragariae</i> _BMP3062      | 11733        | 33205225    | 353          |
| <i>Alternaria_gaisen</i> _BMP2338         | 12774        | 34581883    | 369          |
| <i>Alternaria_limoniasperae</i> _BMP2335  | 12300        | 35112645    | 350          |
| <i>Alternaria_longipes</i> _BMP0313       | 12439        | 36313125    | 343          |
| <i>Alternaria_macrospora</i> _BMP1949     | 11446        | 31742013    | 361          |
| <i>Alternaria_mali</i> _BMP3063           | 12088        | 34085913    | 355          |
| <i>Alternaria_mali</i> _BMP3064           | 12156        | 34664851    | 351          |
| <i>Alternaria_porri</i> _BMP0178          | 11275        | 31231759    | 361          |
| <i>Alternaria_solani</i> _BMP0185         | 11930        | 31649186    | 377          |
| <i>Alternaria_tagetica</i> _BMP0179       | 11347        | 35064290    | 324          |
| <i>Alternaria_tangelonis</i> _BMP2327     | 12017        | 33997552    | 353          |
| <i>Alternaria_tenuissima</i> _BMP0304     | 11798        | 33516964    | 352          |
| <i>Alternaria_tomatophila</i> _BMP2032    | 11893        | 34116351    | 349          |
| <i>Alternaria_turkisafria</i> _BMP3436    | 12122        | 34016511    | 356          |

Supplementary Table S2 Genes unique to the tangerine pathotype of *Alternaria*.

| Group id    | <i>A.alternata</i> Z7 | <i>A.citriarbusti</i> | <i>A.tangelonis</i> | <i>A.turkisafria</i> |
|-------------|-----------------------|-----------------------|---------------------|----------------------|
| prefix08213 | AALTg11736            | cit3 11952            | tan7 11875          | tur6 11833           |
| prefix01447 | AALTg11738            | cit3 11921            | tan7 11813          | tur6 11763           |
| prefix20298 | AALTg11739            | cit3 11920            | tan7 11814          | tur6 11764           |
| prefix11992 | AALTg11745            | cit3 12030            | tan7 11982          | tur6 11517           |
| prefix04636 | AALTg11747            | cit3 11859            | tan7 11720          | tur6 11519           |
| prefix14311 | AALTg11749            | cit3 10964            | tan7 10142          | tur6 11365           |
| prefix00448 | AALTg11750            | cit3 10965            | tan7 10141          | tur6 11220           |
| prefix15510 | AALTg11752            | cit3 11831            | tan7 11664          | tur6 10299           |
| prefix13275 | AALTg11758            | cit3 11314            | tan7 11800          | tur6 11842           |
| prefix06193 | AALTg12031            | cit3 11992            | tan7 11931          | tur6 11867           |

Supplementary Table S3 Numbers of backbone genes involved in secondary metabolism in Z7 and selected fungi.

| Species                  | PKS | NRPS | DMAT | Hybrid | PKS-like | NRPS-like | total |
|--------------------------|-----|------|------|--------|----------|-----------|-------|
| <i>A.alternata</i> Z7    | 12  | 7    | 0    | 0      | 1        | 5         | 25    |
| <i>G.graminicola</i>     | 37  | 5    | 6    | 4      | 1        | 7         | 60    |
| <i>M.grisea</i>          | 27  | 16   | 8    | 2      | 0        | 16        | 69    |
| <i>F.oxysporum</i>       | 9   | 7    | 2    | 2      | 2        | 12        | 34    |
| <i>F.verticillioides</i> | 11  | 7    | 1    | 2      | 1        | 11        | 33    |
| <i>F.graminearum</i>     | 14  | 10   | 0    | 1      | 1        | 11        | 37    |
| <i>N.haematococca</i>    | 12  | 8    | 1    | 1      | 1        | 4         | 27    |
| <i>S.sclerotiorum</i>    | 15  | 5    | 1    | 0      | 2        | 5         | 28    |

Supplementary Table S4 Secondary metabolites biosynthetic gene clusters in *A.alternata* Z7.

| Cluster    | Chromosome-Contig | backbone enzyes | gene       | predicted products                               |
|------------|-------------------|-----------------|------------|--------------------------------------------------|
| Cluster:1  | 29                | NRPS-Like       | AALtg10556 | unknown                                          |
| Cluster:2  | 30                | NRPS            | AALtg10644 | unknown                                          |
| Cluster:3  | 48                | NRPS            | AALtg11749 | ACT-toxin                                        |
| Cluster:4  | 2                 | PKS-Like        | AALtg1495  | unknown                                          |
| Cluster:5  | 2                 | PKS             | AALtg1859  | unknown                                          |
| Cluster:6  | 3                 | PKS             | AALtg2689  | unknown                                          |
| Cluster:7  | 3                 | PKS             | AALtg2730  | unknown                                          |
| Cluster:8  | 4                 | PKS             | AALtg2932  | alternariol and<br>alternariol-9-methyl<br>ether |
| Cluster:9  | 1                 | PKS             | AALtg409   | alternapyrone                                    |
| Cluster:10 | 6                 | NRPS            | AALtg4616  | unknown                                          |
| Cluster:11 | 7                 | NRPS            | AALtg5056  | unknown                                          |
| Cluster:12 | 10                | PKS             | AALtg6337  | unknown                                          |
| Cluster:13 | 10                | NRPS            | AALtg6627  | unknown                                          |
| Cluster:14 | 13                | NRPS-Like       | AALtg7486  | unknown                                          |
| Cluster:15 | 1                 | NRPS            | AALtg869   | dimethyl coprogen                                |
| Cluster:16 | 17                | NRPS-Like       | AALtg8711  | unknown                                          |
| Cluster:17 | 20                | NRPS-Like       | AALtg9348  | unknown                                          |
| Cluster:18 | 21                | NRPS-Like       | AALtg9403  | unknown                                          |

Supplementary Table S5 The host specific ACT-toxin gene cluster in *A.alternata* Z7.

| Number   | Gene id*   | ACT-toxin gene                        | Length(aa) | Gene Ontology:<br>molecular function                                                                  | <i>A.citriarbusti</i> | <i>A.tangelonis</i> | <i>A.turkisafria</i> | Other<br>pathotypes |
|----------|------------|---------------------------------------|------------|-------------------------------------------------------------------------------------------------------|-----------------------|---------------------|----------------------|---------------------|
| a        | AALTg12032 | acyl-CoA dehydrogenase                | 349        | acyl-CoA dehydrogenase activity;<br>flavin adenine dinucleotide binding                               | +                     | +                   | +                    | +                   |
| <b>B</b> | AALTg12031 | enoylreductase ACTTS2                 | 343        | zinc ion binding; oxidoreductase<br>activity<br>NADP binding; flavin adenine<br>dinucleotide binding; | +                     | +                   | +                    | -                   |
| <b>C</b> | AALTg11736 | monooxygenase                         | 608        | N,N-dimethylanilinemonooxygenase<br>activity                                                          | +                     | +                   | +                    | -                   |
| d        | AALTg11737 | oxidoreductase                        | 298        | oxidoreductase activity                                                                               | -                     | -                   | -                    | -                   |
| <b>E</b> | AALTg11738 | hypothetical protein                  | 436        |                                                                                                       | +                     | +                   | +                    | -                   |
| <b>F</b> | AALTg11739 | Thioesterase                          | 216        | hydrolase activity, acting on ester<br>bonds                                                          | +                     | +                   | +                    | -                   |
| g        | AALTg11740 | acyl-CoA synthetase                   | 578        | catalytic activity                                                                                    | +                     | +                   | +                    | +                   |
| h        | AALTg11741 | hydroxymethylglutaryl-CoA<br>synthase | 404        | hydroxymethylglutaryl-CoA<br>synthase activity                                                        | +                     | +                   | +                    | +                   |
| i        | AALTg11742 | transposase                           | 299        | DNA binding                                                                                           | +                     | -                   | -                    | -                   |
| j        | AALTg11743 | hydrolase ACTT2                       | 232        |                                                                                                       | +                     | +                   | +                    | +                   |
| k        | AALTg11744 | hypothetical protein                  | 139        |                                                                                                       | -                     | -                   | -                    | -                   |
| <b>L</b> | AALTg11745 | reverse transcriptase                 | 208        | nucleic acid binding                                                                                  | +                     | +                   | +                    | -                   |
| m        | AALTg11746 | ribonuclease H                        | 610        | nucleic acid binding; protein<br>dimerization activity                                                | +                     | +                   | +                    | +                   |
| <b>N</b> | AALTg11747 | hypothetical protein                  | 304        |                                                                                                       | +                     | +                   | +                    | -                   |

|          |            |                                                                 |      |                                                                                                  |   |   |   |   |
|----------|------------|-----------------------------------------------------------------|------|--------------------------------------------------------------------------------------------------|---|---|---|---|
| o        | AALTg11748 | metalloprotease                                                 | 410  |                                                                                                  | + | + | + | + |
| <b>P</b> | AALTg11749 | non-ribosomal peptide synthetase                                | 1404 | catalytic activity; phosphopantetheine binding                                                   | + | + | + | - |
| <b>Q</b> | AALTg11750 | polyketide synthase ACTTS3                                      | 2457 | catalytic activity; phosphopantetheine binding                                                   | + | + | + | - |
| r        | AALTg11751 | acyl-CoA synthetase ACTT5                                       | 475  | catalytic activity                                                                               | + | + | + | + |
| <b>S</b> | AALTg11752 | hypothetical protein                                            | 297  |                                                                                                  | + | + | + | - |
| t        | AALTg11753 | hypothetical protein                                            | 194  |                                                                                                  | + | + | + | + |
| u        | AALTg11754 | Zn(II) <sub>2</sub> Cys <sub>6</sub> transcription factor ACTTR | 428  | zinc ion binding; RNA polymerase II transcription factor activity, sequence-specific DNA binding | + | + | + | + |
| v        | AALTg11755 | HMG-CoA hydrolase ACTT3                                         | 296  | catalytic activity                                                                               | + | + | + | + |
| w        | AALTg11756 | Zn(II) <sub>2</sub> Cys <sub>6</sub> transcription factor       | 545  |                                                                                                  | + | + | + | + |
| x        | AALTg11757 | polyketide synthase                                             | 2349 | catalytic activity; phosphopantetheine binding                                                   | + | + | + | + |
| <b>Y</b> | AALTg11758 | cytochrome P450 monooxygenase                                   | 439  | iron ion binding; oxidoreductase activity; heme binding                                          | + | + | + | - |

‘\*’: The ACT-toxin gene cluster is located in two contigs, both contigs overlap 2734bp sequence at one end. ‘+’/‘-’: Orthologs present/absent in the corresponding fungus. Capital letters in column ‘Number’ represent genes uniquely present in the tangerine pathotype of *A.alternata*.

Supplementary Table S6 Distribution of CAZymes according to CAZy family among different fungi.

| Species | <i>A. fragariae</i> | <i>A. gaisen</i> | <i>A. limoniasperae</i> | <i>A. longipes</i> | <i>A.alternata_z7</i> | <i>A.arborescens</i> | <i>A.brassicicola</i> | <i>A.mali</i> | <i>B.uckeliana</i> | <i>F.graminearum</i> | <i>M.grisea</i> | <i>P.chrysogenum</i> | <i>P.tritici-repentis</i> |
|---------|---------------------|------------------|-------------------------|--------------------|-----------------------|----------------------|-----------------------|---------------|--------------------|----------------------|-----------------|----------------------|---------------------------|
| AA1     | 11                  | 9                | 8                       | 10                 | 10                    | 11                   | 7                     | 9             | 0                  | 14                   | 15              | 2                    | 11                        |
| AA11    | 0                   | 0                | 0                       | 0                  | 0                     | 0                    | 0                     | 0             | 2                  | 4                    | 7               | 9                    | 0                         |
| AA12    | 0                   | 0                | 0                       | 0                  | 0                     | 0                    | 0                     | 0             | 0                  | 2                    | 4               | 0                    | 0                         |
| AA13    | 0                   | 0                | 0                       | 0                  | 0                     | 0                    | 0                     | 0             | 1                  | 1                    | 1               | 2                    | 0                         |
| AA2     | 2                   | 2                | 1                       | 1                  | 2                     | 2                    | 2                     | 1             | 0                  | 3                    | 5               | 0                    | 2                         |
| AA3     | 30                  | 24               | 28                      | 30                 | 27                    | 34                   | 11                    | 30            | 5                  | 20                   | 21              | 1                    | 21                        |
| AA4     | 4                   | 4                | 5                       | 5                  | 5                     | 5                    | 2                     | 5             | 1                  | 1                    | 0               | 1                    | 4                         |
| AA5     | 2                   | 1                | 2                       | 1                  | 2                     | 1                    | 0                     | 1             | 3                  | 5                    | 4               | 2                    | 2                         |
| AA6     | 0                   | 0                | 0                       | 0                  | 0                     | 0                    | 0                     | 0             | 1                  | 1                    | 1               | 1                    | 0                         |
| AA7     | 17                  | 17               | 14                      | 16                 | 17                    | 17                   | 10                    | 16            | 1                  | 4                    | 2               | 0                    | 15                        |
| AA8     | 0                   | 0                | 0                       | 0                  | 0                     | 0                    | 0                     | 0             | 0                  | 3                    | 7               | 0                    | 0                         |
| AA9     | 19                  | 16               | 24                      | 21                 | 23                    | 23                   | 15                    | 21            | 9                  | 13                   | 24              | 4                    | 17                        |
| CBM1    | 5                   | 4                | 5                       | 6                  | 5                     | 5                    | 4                     | 6             | 1                  | 1                    | 3               | 0                    | 3                         |
| CBM13   | 4                   | 2                | 2                       | 1                  | 3                     | 3                    | 2                     | 1             | 0                  | 1                    | 0               | 0                    | 2                         |
| CBM14   | 0                   | 0                | 0                       | 0                  | 0                     | 0                    | 0                     | 0             | 0                  | 0                    | 0               | 1                    | 0                         |
| CBM18   | 0                   | 0                | 0                       | 0                  | 0                     | 1                    | 1                     | 0             | 0                  | 3                    | 15              | 2                    | 0                         |
| CBM2    | 1                   | 1                | 1                       | 0                  | 0                     | 0                    | 0                     | 0             | 0                  | 0                    | 0               | 0                    | 0                         |
| CBM20   | 1                   | 1                | 1                       | 1                  | 1                     | 2                    | 1                     | 1             | 0                  | 0                    | 0               | 0                    | 2                         |
| CBM21   | 1                   | 1                | 1                       | 1                  | 1                     | 1                    | 0                     | 1             | 1                  | 2                    | 1               | 1                    | 1                         |
| CBM48   | 0                   | 0                | 0                       | 0                  | 0                     | 0                    | 0                     | 0             | 2                  | 2                    | 2               | 1                    | 1                         |
| CBM5    | 0                   | 0                | 0                       | 0                  | 0                     | 1                    | 0                     | 0             | 0                  | 0                    | 0               | 0                    | 1                         |
| CBM50   | 2                   | 1                | 2                       | 3                  | 1                     | 2                    | 0                     | 3             | 1                  | 9                    | 7               | 5                    | 0                         |
| CBM52   | 0                   | 0                | 0                       | 0                  | 0                     | 0                    | 0                     | 0             | 0                  | 0                    | 1               | 0                    | 0                         |
| CBM63   | 0                   | 0                | 0                       | 0                  | 0                     | 0                    | 0                     | 0             | 1                  | 3                    | 1               | 1                    | 0                         |



|       |    |    |    |    |    |    |    |    |    |    |    |    |    |
|-------|----|----|----|----|----|----|----|----|----|----|----|----|----|
| CE1   | 2  | 0  | 1  | 1  | 1  | 2  | 2  | 1  | 2  | 4  | 9  | 1  | 1  |
| CE10  | 28 | 23 | 30 | 31 | 28 | 25 | 22 | 31 | 0  | 0  | 0  | 0  | 22 |
| CE12  | 1  | 1  | 1  | 1  | 1  | 1  | 1  | 1  | 3  | 3  | 3  | 2  | 0  |
| CE14  | 0  | 0  | 0  | 0  | 0  | 0  | 0  | 0  | 0  | 0  | 0  | 0  | 1  |
| CE15  | 0  | 0  | 0  | 0  | 0  | 0  | 0  | 0  | 0  | 0  | 1  | 1  | 0  |
| CE16  | 0  | 0  | 0  | 0  | 0  | 0  | 0  | 0  | 6  | 5  | 2  | 1  | 0  |
| CE2   | 0  | 0  | 0  | 0  | 0  | 0  | 0  | 0  | 0  | 1  | 1  | 0  | 0  |
| CE3   | 0  | 0  | 0  | 0  | 0  | 0  | 0  | 0  | 1  | 5  | 6  | 4  | 0  |
| CE4   | 8  | 7  | 9  | 9  | 8  | 8  | 4  | 9  | 5  | 7  | 10 | 5  | 7  |
| CE5   | 11 | 10 | 12 | 12 | 12 | 12 | 7  | 12 | 11 | 13 | 17 | 4  | 11 |
| CE8   | 3  | 2  | 3  | 3  | 3  | 3  | 3  | 3  | 5  | 3  | 1  | 2  | 2  |
| CE9   | 0  | 0  | 0  | 0  | 0  | 0  | 0  | 0  | 2  | 1  | 1  | 1  | 0  |
| GH1   | 2  | 3  | 2  | 2  | 2  | 3  | 2  | 2  | 3  | 3  | 2  | 3  | 2  |
| GH10  | 6  | 5  | 6  | 6  | 6  | 5  | 4  | 6  | 2  | 5  | 6  | 3  | 4  |
| GH105 | 3  | 3  | 3  | 3  | 3  | 3  | 3  | 3  | 1  | 3  | 4  | 2  | 2  |
| GH109 | 0  | 1  | 0  | 0  | 0  | 0  | 0  | 0  | 0  | 0  | 0  | 0  | 0  |
| GH11  | 5  | 3  | 3  | 3  | 4  | 4  | 3  | 3  | 3  | 3  | 5  | 1  | 3  |
| GH114 | 0  | 0  | 0  | 0  | 0  | 0  | 0  | 0  | 1  | 2  | 1  | 2  | 0  |
| GH115 | 0  | 0  | 0  | 0  | 0  | 0  | 0  | 0  | 1  | 2  | 2  | 0  | 0  |
| GH12  | 4  | 3  | 3  | 3  | 4  | 4  | 0  | 3  | 5  | 4  | 3  | 3  | 1  |
| GH125 | 2  | 2  | 2  | 2  | 2  | 2  | 1  | 2  | 3  | 3  | 6  | 1  | 3  |
| GH127 | 0  | 0  | 0  | 0  | 0  | 0  | 0  | 0  | 1  | 1  | 0  | 0  | 0  |
| GH128 | 5  | 4  | 4  | 5  | 4  | 3  | 4  | 5  | 4  | 4  | 4  | 1  | 3  |
| GH13  | 4  | 4  | 4  | 4  | 4  | 4  | 4  | 4  | 11 | 8  | 10 | 16 | 4  |
| GH131 | 0  | 0  | 0  | 0  | 0  | 0  | 0  | 0  | 1  | 1  | 5  | 0  | 0  |
| GH132 | 0  | 0  | 0  | 0  | 0  | 0  | 0  | 0  | 2  | 2  | 2  | 2  | 0  |

|       |    |    |    |    |    |    |    |    |    |    |    |    |    |    |
|-------|----|----|----|----|----|----|----|----|----|----|----|----|----|----|
| GH134 | 0  | 0  | 0  | 0  | 0  | 0  | 0  | 0  | 0  | 0  | 0  | 0  | 3  | 0  |
| GH15  | 2  | 2  | 2  | 2  | 2  | 2  | 2  | 2  | 2  | 5  | 3  | 2  | 3  | 3  |
| GH16  | 6  | 7  | 6  | 6  | 6  | 6  | 3  | 6  | 23 | 24 | 17 | 16 | 7  | 7  |
| GH17  | 1  | 1  | 1  | 0  | 1  | 1  | 2  | 0  | 6  | 6  | 7  | 5  | 1  | 1  |
| GH18  | 9  | 8  | 9  | 9  | 9  | 7  | 4  | 9  | 10 | 17 | 16 | 8  | 7  | 7  |
| GH2   | 2  | 2  | 3  | 3  | 2  | 3  | 1  | 3  | 2  | 10 | 8  | 6  | 3  | 3  |
| GH20  | 1  | 1  | 1  | 1  | 1  | 1  | 1  | 1  | 1  | 3  | 3  | 2  | 1  | 1  |
| GH24  | 0  | 0  | 0  | 0  | 0  | 0  | 0  | 0  | 0  | 0  | 1  | 0  | 0  | 0  |
| GH25  | 0  | 0  | 0  | 0  | 0  | 0  | 0  | 0  | 0  | 0  | 0  | 1  | 0  | 0  |
| GH26  | 1  | 1  | 1  | 1  | 1  | 1  | 1  | 1  | 2  | 0  | 0  | 1  | 0  | 0  |
| GH27  | 4  | 2  | 5  | 5  | 5  | 3  | 2  | 5  | 4  | 2  | 4  | 1  | 4  | 4  |
| GH28  | 7  | 7  | 8  | 8  | 8  | 8  | 5  | 8  | 19 | 7  | 4  | 5  | 4  | 4  |
| GH29  | 0  | 0  | 0  | 0  | 0  | 0  | 1  | 0  | 0  | 1  | 4  | 0  | 0  | 0  |
| GH3   | 14 | 12 | 12 | 12 | 11 | 12 | 7  | 12 | 16 | 21 | 18 | 17 | 8  | 8  |
| GH30  | 0  | 0  | 1  | 0  | 1  | 1  | 0  | 0  | 0  | 0  | 1  | 1  | 1  | 1  |
| GH31  | 2  | 2  | 2  | 2  | 2  | 2  | 3  | 2  | 4  | 8  | 6  | 11 | 3  | 3  |
| GH32  | 2  | 2  | 2  | 2  | 2  | 2  | 1  | 2  | 1  | 5  | 5  | 7  | 1  | 1  |
| GH33  | 0  | 0  | 1  | 1  | 1  | 0  | 0  | 1  | 0  | 1  | 0  | 2  | 0  | 0  |
| GH35  | 4  | 2  | 4  | 4  | 4  | 4  | 3  | 4  | 4  | 3  | 0  | 2  | 3  | 3  |
| GH36  | 2  | 2  | 1  | 1  | 1  | 1  | 2  | 1  | 2  | 3  | 1  | 2  | 0  | 0  |
| GH37  | 1  | 1  | 1  | 1  | 1  | 2  | 2  | 1  | 1  | 2  | 2  | 1  | 2  | 2  |
| GH38  | 1  | 1  | 1  | 1  | 1  | 1  | 1  | 1  | 1  | 1  | 2  | 1  | 1  | 1  |
| GH39  | 0  | 0  | 0  | 0  | 0  | 0  | 0  | 0  | 1  | 2  | 2  | 2  | 0  | 0  |
| GH42  | 0  | 0  | 0  | 0  | 0  | 0  | 0  | 0  | 0  | 0  | 0  | 1  | 0  | 0  |
| GH43  | 12 | 11 | 14 | 14 | 14 | 14 | 10 | 14 | 5  | 18 | 18 | 14 | 11 | 11 |
| GH45  | 2  | 2  | 2  | 2  | 2  | 2  | 0  | 2  | 2  | 1  | 1  | 0  | 2  | 2  |

|      |   |   |    |   |   |   |   |   |    |    |    |    |    |
|------|---|---|----|---|---|---|---|---|----|----|----|----|----|
| GH47 | 9 | 8 | 10 | 9 | 9 | 9 | 7 | 9 | 8  | 10 | 9  | 6  | 16 |
| GH5  | 7 | 6 | 7  | 7 | 7 | 6 | 5 | 7 | 16 | 14 | 13 | 13 | 3  |
| GH51 | 2 | 2 | 2  | 2 | 2 | 2 | 2 | 2 | 4  | 2  | 3  | 3  | 2  |
| GH53 | 1 | 1 | 1  | 1 | 1 | 1 | 1 | 1 | 2  | 1  | 1  | 1  | 0  |
| GH54 | 1 | 0 | 1  | 1 | 1 | 1 | 1 | 1 | 1  | 1  | 1  | 1  | 1  |
| GH55 | 2 | 3 | 3  | 3 | 3 | 3 | 2 | 3 | 4  | 3  | 7  | 3  | 1  |
| GH6  | 3 | 2 | 3  | 3 | 3 | 3 | 2 | 3 | 1  | 1  | 3  | 1  | 3  |
| GH62 | 2 | 1 | 2  | 2 | 2 | 2 | 1 | 2 | 1  | 2  | 4  | 1  | 1  |
| GH63 | 2 | 1 | 2  | 2 | 2 | 2 | 2 | 2 | 1  | 1  | 2  | 1  | 2  |
| GH64 | 0 | 0 | 0  | 0 | 0 | 0 | 0 | 0 | 2  | 2  | 2  | 2  | 0  |
| GH65 | 0 | 1 | 0  | 0 | 0 | 0 | 0 | 0 | 2  | 0  | 0  | 1  | 0  |
| GH67 | 1 | 1 | 1  | 1 | 1 | 1 | 0 | 1 | 0  | 1  | 1  | 1  | 1  |
| GH7  | 4 | 3 | 4  | 4 | 4 | 4 | 4 | 4 | 2  | 2  | 6  | 2  | 3  |
| GH71 | 0 | 0 | 0  | 0 | 0 | 0 | 0 | 0 | 11 | 0  | 1  | 6  | 0  |
| GH72 | 5 | 5 | 6  | 5 | 6 | 5 | 4 | 5 | 6  | 3  | 5  | 6  | 5  |
| GH74 | 0 | 0 | 0  | 0 | 0 | 0 | 0 | 0 | 0  | 1  | 1  | 0  | 0  |
| GH75 | 0 | 0 | 0  | 0 | 0 | 0 | 0 | 0 | 0  | 1  | 1  | 1  | 0  |
| GH76 | 5 | 7 | 6  | 6 | 6 | 6 | 6 | 6 | 11 | 8  | 8  | 8  | 4  |
| GH78 | 4 | 4 | 4  | 4 | 4 | 4 | 0 | 4 | 8  | 7  | 3  | 5  | 3  |
| GH79 | 0 | 0 | 0  | 0 | 0 | 0 | 0 | 0 | 2  | 1  | 2  | 2  | 0  |
| GH81 | 0 | 1 | 1  | 1 | 1 | 1 | 0 | 1 | 1  | 1  | 2  | 1  | 1  |
| GH84 | 0 | 0 | 0  | 0 | 0 | 0 | 0 | 0 | 0  | 0  | 0  | 1  | 0  |
| GH85 | 0 | 0 | 0  | 0 | 0 | 0 | 1 | 0 | 0  | 0  | 0  | 0  | 1  |
| GH88 | 1 | 1 | 0  | 1 | 0 | 0 | 0 | 1 | 1  | 1  | 1  | 0  | 0  |
| GH92 | 5 | 5 | 4  | 5 | 4 | 5 | 3 | 5 | 5  | 0  | 6  | 4  | 5  |
| GH93 | 0 | 0 | 0  | 0 | 0 | 0 | 0 | 0 | 1  | 2  | 1  | 2  | 0  |

|      |   |   |   |   |   |    |   |   |    |    |    |    |   |   |
|------|---|---|---|---|---|----|---|---|----|----|----|----|---|---|
| GH94 | 1 | 1 | 1 | 1 | 1 | 1  | 1 | 1 | 1  | 0  | 0  | 1  | 0 | 1 |
| GH95 | 0 | 0 | 0 | 0 | 0 | 0  | 0 | 0 | 0  | 2  | 2  | 1  | 1 | 0 |
| GT1  | 6 | 4 | 7 | 7 | 7 | 6  | 2 | 7 | 13 | 16 | 13 | 6  | 3 | 3 |
| GT15 | 3 | 3 | 3 | 3 | 3 | 3  | 1 | 3 | 4  | 4  | 4  | 3  | 4 | 4 |
| GT17 | 0 | 0 | 0 | 0 | 0 | 0  | 0 | 0 | 2  | 2  | 1  | 0  | 0 | 0 |
| GT2  | 3 | 3 | 3 | 3 | 3 | 3  | 2 | 3 | 13 | 20 | 11 | 13 | 4 | 4 |
| GT20 | 3 | 2 | 3 | 3 | 3 | 3  | 3 | 3 | 3  | 3  | 3  | 9  | 3 | 3 |
| GT21 | 0 | 0 | 0 | 0 | 0 | 0  | 0 | 0 | 1  | 1  | 1  | 1  | 0 | 0 |
| GT22 | 3 | 2 | 2 | 2 | 2 | 3  | 2 | 2 | 4  | 4  | 4  | 4  | 1 | 1 |
| GT24 | 1 | 1 | 1 | 1 | 1 | 1  | 1 | 1 | 1  | 1  | 1  | 1  | 1 | 1 |
| GT25 | 0 | 0 | 0 | 0 | 0 | 0  | 0 | 0 | 2  | 0  | 6  | 3  | 0 | 0 |
| GT3  | 1 | 0 | 1 | 1 | 1 | 1  | 0 | 1 | 1  | 1  | 1  | 1  | 1 | 1 |
| GT31 | 0 | 0 | 0 | 0 | 0 | 0  | 0 | 0 | 6  | 5  | 4  | 6  | 0 | 0 |
| GT32 | 2 | 3 | 3 | 3 | 3 | 2  | 2 | 3 | 6  | 5  | 10 | 9  | 2 | 2 |
| GT33 | 0 | 0 | 0 | 0 | 0 | 0  | 0 | 0 | 0  | 1  | 1  | 1  | 0 | 0 |
| GT34 | 9 | 6 | 8 | 9 | 9 | 11 | 5 | 9 | 1  | 2  | 2  | 3  | 3 | 3 |
| GT35 | 1 | 1 | 1 | 1 | 1 | 1  | 1 | 1 | 1  | 1  | 1  | 1  | 1 | 1 |
| GT39 | 3 | 3 | 3 | 3 | 3 | 3  | 2 | 3 | 3  | 3  | 3  | 3  | 3 | 3 |
| GT4  | 3 | 2 | 3 | 3 | 3 | 3  | 2 | 3 | 5  | 5  | 4  | 5  | 4 | 4 |
| GT41 | 1 | 1 | 1 | 1 | 1 | 1  | 0 | 1 | 1  | 1  | 1  | 1  | 0 | 0 |
| GT48 | 1 | 1 | 1 | 1 | 1 | 1  | 0 | 1 | 2  | 1  | 1  | 1  | 1 | 1 |
| GT50 | 0 | 0 | 0 | 0 | 0 | 0  | 0 | 0 | 1  | 1  | 1  | 1  | 0 | 0 |
| GT55 | 0 | 0 | 0 | 0 | 0 | 0  | 0 | 0 | 0  | 0  | 1  | 0  | 1 | 1 |
| GT57 | 0 | 0 | 0 | 0 | 0 | 0  | 0 | 0 | 2  | 2  | 2  | 2  | 0 | 0 |
| GT58 | 1 | 1 | 1 | 1 | 1 | 1  | 1 | 1 | 1  | 1  | 1  | 1  | 1 | 1 |
| GT59 | 1 | 1 | 1 | 1 | 1 | 1  | 1 | 1 | 0  | 1  | 1  | 1  | 0 | 0 |

---

|      |   |   |   |   |   |   |   |   |   |   |   |   |   |   |
|------|---|---|---|---|---|---|---|---|---|---|---|---|---|---|
| GT61 | 0 | 0 | 0 | 0 | 0 | 0 | 0 | 0 | 0 | 0 | 0 | 3 | 0 | 0 |
| GT62 | 2 | 2 | 1 | 2 | 2 | 2 | 2 | 3 | 2 | 3 | 3 | 3 | 3 | 3 |
| GT64 | 0 | 0 | 0 | 0 | 0 | 0 | 0 | 0 | 0 | 0 | 2 | 0 | 0 | 0 |
| GT66 | 0 | 0 | 0 | 0 | 0 | 0 | 0 | 0 | 0 | 1 | 1 | 1 | 1 | 1 |
| GT69 | 2 | 3 | 2 | 3 | 2 | 2 | 0 | 3 | 3 | 3 | 2 | 4 | 2 | 3 |
| GT71 | 1 | 1 | 1 | 1 | 1 | 1 | 1 | 1 | 1 | 5 | 4 | 4 | 3 | 1 |
| GT76 | 1 | 1 | 1 | 1 | 1 | 1 | 1 | 0 | 1 | 2 | 1 | 1 | 1 | 1 |
| GT8  | 2 | 3 | 3 | 2 | 2 | 3 | 2 | 2 | 7 | 7 | 6 | 2 | 5 | 3 |
| GT90 | 0 | 0 | 0 | 0 | 0 | 0 | 0 | 0 | 0 | 3 | 6 | 6 | 6 | 1 |
| PL1  | 6 | 6 | 7 | 7 | 6 | 6 | 4 | 7 | 6 | 6 | 9 | 2 | 5 | 6 |
| PL20 | 0 | 0 | 0 | 0 | 0 | 0 | 0 | 0 | 0 | 0 | 1 | 1 | 0 | 0 |
| PL3  | 5 | 5 | 5 | 6 | 5 | 6 | 8 | 6 | 2 | 2 | 7 | 1 | 1 | 3 |
| PL4  | 0 | 0 | 0 | 0 | 0 | 0 | 0 | 0 | 0 | 0 | 3 | 1 | 3 | 0 |
| PL7  | 0 | 0 | 0 | 0 | 0 | 0 | 0 | 0 | 0 | 1 | 0 | 0 | 0 | 0 |
| PL9  | 0 | 0 | 0 | 0 | 0 | 0 | 0 | 0 | 0 | 0 | 1 | 0 | 0 | 0 |

---

Supplementary Table S7 Differentially expressed genes that enriched in the category 'oxidoreductase activity'.

| ID         | log2FC | P-adj    | annotation                                               |
|------------|--------|----------|----------------------------------------------------------|
| AALTg3456  | 5.12   | 8.06E-43 | 2,4-dichlorophenol 6-monooxygenase                       |
| AALTg3691  | 4.73   | 2.05E-53 | alcohol dehydrogenase                                    |
| AALTg2809  | 4.34   | 1.12E-53 | glutathione reductase                                    |
| AALTg8994  | 4.34   | 2.20E-08 | peroxisomal catalase                                     |
| AALTg9933  | 4.32   | 8.58E-64 | catalase A                                               |
| AALTg5523  | 4.32   | 1.36E-40 | alcohol dehydrogenase                                    |
| AALTg11123 | 4.09   | 5.22E-18 | Alcohol dehydrogenase superfamily zinc-containing        |
| AALTg7769  | 4.02   | 3.92E-42 | thioredoxin reductase                                    |
| AALTg353   | 3.98   | 1.23E-42 | 3-chlorobenzoate-3,4-dioxygenase reductase subunit       |
| AALTg215   | 3.83   | 8.86E-39 | Aldo keto reductase                                      |
| AALTg1523  | 3.76   | 1.69E-61 | catalase-peroxidase                                      |
| AALTg1561  | 3.68   | 5.75E-42 | FAD-binding domain                                       |
| AALTg398   | 3.67   | 4.10E-54 | zinc-binding oxidoreductase                              |
| AALTg6718  | 3.64   | 5.82E-41 | NAD dependent epimerase dehydratase family               |
| AALTg2751  | 3.42   | 1.32E-05 | nadh2:quinone reductase                                  |
| AALTg9032  | 3.36   | 2.39E-24 | mycelial catalase Cat1                                   |
| AALTg1664  | 3.33   | 1.70E-03 | catalase domain containing                               |
| AALTg275   | 3.32   | 2.94E-14 | oxidoreductase                                           |
| AALTg473   | 3.27   | 7.08E-04 | cytochrome P450                                          |
| AALTg9998  | 3.23   | 2.83E-06 | hypothetical protein W97_01942                           |
| AALTg6800  | 3.19   | 8.97E-07 | zinc alcohol dehydrogenase,                              |
| AALTg11797 | 3.17   | 3.79E-35 | glucose oxidase                                          |
| AALTg5137  | 3.16   | 1.84E-14 | cytochrome P450 4A10                                     |
| AALTg4968  | 3.15   | 1.57E-20 | Dehydroquinase synthase                                  |
| AALTg6835  | 2.97   | 7.01E-37 | D-3-phosphoglycerate dehydrogenase                       |
| AALTg10949 | 2.95   | 1.07E-33 | pyridine nucleotide-disulfide oxidoreductase class-2     |
| AALTg4285  | 2.92   | 1.29E-20 | FAD dependent oxidoreductase                             |
| AALTg4679  | 2.83   | 2.69E-06 | quinone oxidoreductase                                   |
| AALTg5416  | 2.83   | 2.43E-21 | NADP-dependent leukotriene B4<br>12-hydroxydehydrogenase |
| AALTg11389 | 2.76   | 4.57E-34 | FMN-binding split barrel-related                         |
| AALTg4863  | 2.76   | 4.70E-24 | NADPH2 dehydrogenase                                     |
| AALTg5757  | 2.76   | 1.49E-30 | S-(hydroxymethyl)glutathione dehydrogenase               |
| AALTg11995 | 2.66   | 1.57E-24 | NADH-dependent flavin oxidoreductase                     |
| AALTg4107  | 2.61   | 7.04E-06 | fad linked oxidase                                       |
| AALTg319   | 2.59   | 4.06E-20 | molybdopterin binding oxidoreductase                     |
| AALTg5326  | 2.47   | 1.84E-17 | zinc-binding alcohol dehydrogenase                       |
| AALTg10951 | 2.46   | 1.27E-23 | mitochondrial peroxiredoxin Prx1                         |
| AALTg2814  | 2.44   | 1.27E-28 | cytochrome c peroxidase                                  |
| AALTg5739  | 2.41   | 1.06E-22 | tri-functional histidine biosynthesis                    |

|            |      |          |                                                             |
|------------|------|----------|-------------------------------------------------------------|
| AALTg3043  | 2.40 | 7.87E-09 | FAD binding domain                                          |
| AALTg10228 | 2.39 | 1.22E-23 | Peptide methionine sulfoxide reductase                      |
| AALTg41    | 2.31 | 1.74E-22 | glutathione peroxidase 1                                    |
| AALTg11609 | 2.30 | 1.77E-26 | 6-phosphogluconate dehydrogenase                            |
| AALTg1812  | 2.27 | 5.55E-24 | peroxiredoxin TSA1                                          |
| AALTg666   | 2.22 | 3.79E-10 | FMN-dependent dehydrogenase                                 |
| AALTg3134  | 2.19 | 5.98E-08 | pisatin demethylase                                         |
| AALTg7589  | 2.17 | 1.22E-13 | Lathosterol oxidase                                         |
| AALTg10668 | 2.17 | 7.05E-13 | glutaryl- dehydrogenase                                     |
| AALTg3306  | 2.14 | 1.80E-08 | maleylacetate reductase                                     |
| AALTg11345 | 2.13 | 8.47E-17 | NADH-ubiquinone oxidoreductase 64 kDa subunit               |
| AALTg4224  | 2.10 | 2.66E-06 | precorrin 3B synthase                                       |
| AALTg4587  | 2.10 | 4.71E-18 | FMN-linked oxidoreductase                                   |
| AALTg8230  | 2.09 | 4.02E-19 | glycerol-3-phosphate dehydrogenase, mitochondrial precursor |
| AALTg3590  | 2.04 | 2.34E-08 | alcohol dehydrogenase                                       |
| AALTg7455  | 2.02 | 6.23E-13 | L-lactate dehydrogenase (cytochrome)                        |
| AALTg8957  | 1.97 | 3.04E-04 | alpha-ketoglutarate-dependent taurine dioxygenase           |
| AALTg10478 | 1.95 | 5.75E-09 | hypothetical protein SETTUDRAFT_134436                      |
| AALTg5382  | 1.91 | 6.85E-03 | DNA repair family                                           |
| AALTg10141 | 1.89 | 2.21E-09 | L-lactate dehydrogenase                                     |
| AALTg9951  | 1.87 | 1.76E-06 | FAD dependent oxidoreductase                                |
| AALTg5763  | 1.82 | 3.09E-16 | nadh-cytochrome b5 reductase                                |
| AALTg2786  | 1.81 | 3.47E-12 | 3-oxo-5-alpha-steroid 4-dehydrogenase                       |
| AALTg1647  | 1.81 | 7.56E-13 | kynurenine 3-monooxygenase                                  |
| AALTg9558  | 1.75 | 1.42E-03 | FAD NAD(P)-binding domain-containing                        |
| AALTg409   | 1.73 | 4.62E-05 | polyketide synthase                                         |
| AALTg8354  | 1.73 | 7.56E-07 | NAD-dependent malic enzyme 1                                |
| AALTg3682  | 1.73 | 5.34E-13 | nadph-dependent medium chain alcohol dehydrogenase          |
| AALTg6641  | 1.72 | 3.34E-06 | L-galactose dehydrogenase (L- )                             |
| AALTg9044  | 1.72 | 1.43E-09 | mitochondrial FAD-linked sulfhydryl oxidase ERV1            |
| AALTg3897  | 1.69 | 9.48E-03 | alcohol dehydrogenase                                       |
| AALTg11795 | 1.69 | 1.19E-10 | Carboxymuconolactone decarboxylase                          |
| AALTg8364  | 1.68 | 1.27E-09 | 6-phosphogluconate dehydrogenase C-terminal domain          |
| AALTg3633  | 1.65 | 7.86E-03 | ferric-chelate reductase                                    |
| AALTg1841  | 1.64 | 4.76E-08 | phosphoadenosine phosphosulfate reductase                   |
| AALTg11642 | 1.64 | 4.68E-11 | alcohol dehydrogenase                                       |
| AALTg5665  | 1.59 | 3.42E-03 | oxidoreductase domain containing                            |
| AALTg5306  | 1.58 | 2.85E-07 | glutathione transferase omega-1                             |
| AALTg2893  | 1.58 | 3.57E-08 | FMN-dependent alpha-hydroxy acid dehydrogenase              |
| AALTg1718  | 1.56 | 5.56E-11 | aspartate-semialdehyde dehydrogenase                        |
| AALTg4194  | 1.54 | 9.38E-07 | NADPH:adrenodoxin oxidoreductase, mitochondrial precursor   |
| AALTg1566  | 1.53 | 2.71E-06 | 2-polyprenyl-6-methoxyphenol hydroxylase-like               |

|            |       |          |                                                                            |
|------------|-------|----------|----------------------------------------------------------------------------|
|            |       |          | oxidoreductase                                                             |
| AALTg9783  | 1.53  | 1.36E-06 | quinone oxidoreductase                                                     |
| AALTg8874  | 1.52  | 1.75E-04 | sterol desaturase family                                                   |
| AALTg10309 | 1.44  | 3.12E-05 | aflatoxin B1-aldehyde reductase                                            |
| AALTg1441  | 1.42  | 1.52E-08 | zinc-binding dehydrogenase                                                 |
| AALTg1795  | 1.40  | 3.27E-05 | phytoene dehydrogenase                                                     |
| AALTg11153 | 1.37  | 1.50E-04 | homogentisate 1,2-dioxygenase                                              |
| AALTg4006  | 1.37  | 9.13E-08 | Shikimate kinase                                                           |
| AALTg11209 | 1.37  | 3.19E-03 | L-lactate dehydrogenase                                                    |
| AALTg8452  | 1.35  | 8.41E-05 | ATP binding                                                                |
| AALTg2529  | 1.35  | 6.98E-05 | NAD-specific glutamate dehydrogenase                                       |
| AALTg717   | 1.29  | 7.04E-06 | methionine-R-sulfoxide reductase                                           |
| AALTg348   | 1.27  | 4.13E-05 | sulfite reductase flavo component                                          |
| AALTg3600  | 1.24  | 7.36E-04 | amine oxidase                                                              |
| AALTg2498  | 1.23  | 5.23E-05 | FAD dependent oxidoreductase                                               |
| AALTg8160  | 1.21  | 7.97E-03 | benzoate 4-monooxygenase cytochrome P450                                   |
| AALTg1122  | 1.16  | 1.04E-03 | pyridine nucleotide-disulphide oxidoreductase,                             |
| AALTg6527  | 1.14  | 5.16E-06 | glycerol dehydrogenase                                                     |
| AALTg3871  | 1.14  | 7.04E-06 | conserved hypothetical protein                                             |
| AALTg2795  | 1.11  | 1.15E-04 | aldo keto reductase                                                        |
| AALTg366   | 1.10  | 2.46E-03 | cytochrome P450                                                            |
| AALTg2177  | 1.08  | 8.55E-03 | flavin dependent monooxygenase                                             |
| AALTg1283  | 1.07  | 4.07E-04 | Succinic semialdehyde dehydrogenase                                        |
| AALTg1758  | 1.05  | 7.48E-03 | siroheme synthase                                                          |
| AALTg6836  | 1.00  | 1.38E-05 | glucose-6-phosphate 1-dehydrogenase                                        |
| AALTg4772  | -1.02 | 1.85E-03 | 2-nitropropane dioxygenase                                                 |
| AALTg4384  | -1.04 | 7.67E-05 | formate dehydrogenase                                                      |
| AALTg198   | -1.05 | 1.93E-04 | FMN-linked oxidoreductase                                                  |
| AALTg7620  | -1.07 | 1.50E-03 | Cytochrome P450                                                            |
| AALTg4399  | -1.11 | 9.00E-06 | coproporphyrinogen III oxidase                                             |
| AALTg8358  | -1.16 | 2.41E-03 | benzoate 4-monooxygenase cytochrome P450                                   |
| AALTg7370  | -1.17 | 2.36E-06 | delta-1-pyrroline-5-carboxylate dehydrogenase,<br>mitochondrial            |
| AALTg7790  | -1.19 | 9.61E-04 | fumarate reductase                                                         |
| AALTg6572  | -1.19 | 2.46E-05 | trimethyllysine dioxygenase                                                |
| AALTg8569  | -1.24 | 1.34E-03 | isovaleryl- dehydrogenase                                                  |
| AALTg7358  | -1.30 | 1.80E-06 | Cytochrome P450                                                            |
| AALTg7699  | -1.31 | 1.45E-07 | 14-alpha sterol demethylase Cyp51B                                         |
| AALTg3330  | -1.32 | 5.41E-03 | benzoate 4-monooxygenase cytochrome P450,<br>NADP-dependent leukotriene B4 |
| AALTg5369  | -1.32 | 2.36E-04 | 12-hydroxydehydrogenase                                                    |
| AALTg3232  | -1.35 | 1.68E-04 | D-amino-acid oxidase                                                       |
| AALTg8807  | -1.42 | 1.52E-03 | aldehyde dehydrogenase                                                     |
| AALTg7831  | -1.42 | 3.74E-04 | monooxygenase FAD-binding                                                  |



|            |       |          |                                                    |
|------------|-------|----------|----------------------------------------------------|
| AALTg6028  | -1.43 | 4.94E-05 | NADPH oxidase B                                    |
| AALTg5948  | -1.43 | 2.21E-05 | acyl- dehydrogenase family                         |
| AALTg7698  | -1.44 | 1.39E-03 | oxidoreductase, 2-nitropropane dioxygenase family, |
| AALTg9303  | -1.45 | 4.47E-03 | sorbitol dehydrogenase                             |
| AALTg7278  | -1.49 | 1.21E-07 | flavin-binding monooxygenase                       |
| AALTg387   | -1.51 | 9.44E-03 | WSC domain-containing                              |
| AALTg8571  | -1.54 | 2.97E-05 | catechol dioxygenase                               |
| AALTg2155  | -1.54 | 6.04E-05 | 2-nitropropane dioxygenase                         |
| AALTg7817  | -1.67 | 2.11E-08 | Fe II 2-oxoglutarate-dependent dioxygenase         |
| AALTg9357  | -1.75 | 7.79E-04 | phenylacetate hydroxylase                          |
| AALTg4185  | -1.79 | 8.75E-06 | nitrate reductase [NADPH]                          |
| AALTg7195  | -1.85 | 1.29E-04 | FAD NAD-P-binding domain-containing                |
| AALTg3225  | -1.85 | 5.83E-08 | isoamyl alcohol oxidase                            |
| AALTg10600 | -1.89 | 2.30E-06 | FAD-linked sulfhydryl oxidase ERV2                 |
| AALTg9891  | -1.90 | 5.46E-09 | dimethylaniline monooxygenase 2                    |
| AALTg9212  | -1.91 | 6.94E-05 | alcohol dehydrogenase                              |
| AALTg5338  | -1.97 | 8.95E-14 | fad binding domain-containing                      |
| AALTg1316  | -2.01 | 2.96E-15 | squalene epoxidase                                 |
| AALTg9280  | -2.01 | 3.85E-03 | sarcosine oxidase                                  |
| AALTg10932 | -2.05 | 1.30E-03 | 3-hydroxyacyl- dehydrogenase                       |
| AALTg10173 | -2.07 | 8.56E-04 | GMC oxidoreductase                                 |
| AALTg11894 | -2.09 | 5.54E-05 | bifunctional P-450:NADPH-P450 reductase            |
| AALTg5241  | -2.39 | 1.00E-27 | FAD dependent oxidoreductase                       |
| AALTg6244  | -2.54 | 2.03E-21 | acyl- desaturase                                   |
| AALTg6701  | -2.56 | 4.80E-24 | C-5 sterol desaturase                              |
| AALTg4186  | -3.32 | 6.76E-25 | nitrite reductase                                  |
| AALTg5212  | -3.53 | 6.22E-44 | uricase                                            |

---

Supplementary Table S8 Differentially expressed genes encoding kinases.

| ID         | Subfamily            | log2FC | padj     | annotation                                    |
|------------|----------------------|--------|----------|-----------------------------------------------|
| AALTg3688  | CMGC_group2_multiple | 2.10   | 6.29E-09 | kinase domain-containing                      |
| AALTg8919  | CAMK_group6_multiple | 1.98   | 3.78E-15 | nitrogen permease reactivator                 |
| AALTg8419  | CAMK_group5_multiple | 1.92   | 3.72E-13 | Ca <sup>2+</sup> calmodulin-dependent kinase  |
| AALTg3740  | CAMK_group7_multiple | 1.27   | 4.26E-06 | serine threonine kinase SNF1p                 |
| AALTg7163  | AGC_group2_multiple  | 1.23   | 4.23E-06 | serine threonine- kinase nrc-2                |
| AALTg10096 | CMGC_group1_multiple | 1.21   | 2.14E-06 | map kinase Hog1                               |
| AALTg6950  |                      | 1.18   | 7.76E-04 | serine threonine kinase                       |
| AALTg3039  | STE_group3_multiple  | 1.09   | 2.53E-04 | STE STE7 MKK kinase                           |
| AALTg6372  | CMGC_group4_multiple | 1.06   | 2.63E-05 | serine kinase Sky1                            |
| AALTg8652  | AGC_group4_multiple  | 1.03   | 7.03E-04 | histidine kinase HHK1p                        |
| AALTg6232  | AGC_group4_multiple  | -2.25  | 3.94E-12 | serine threonine- kinase 12 calcium           |
| AALTg3632  | STE_group3_multiple  | -1.86  | 1.26E-04 | calmodulin-dependent kinase type 2 beta chain |
| AALTg9127  | CMGC_group2_multiple | -1.80  | 3.11E-04 | serine threonine kinase Hsk1                  |
| AALTg2090  | AGC_group2_multiple  | -1.73  | 9.43E-04 | serine threonine- kinase cbk1                 |
| AALTg9028  | AGC_group5_multiple  | -1.16  | 1.27E-03 | checkpoint kinase                             |
| AALTg2778  | AGC_group5_multiple  | -1.06  | 6.13E-03 | IKS kinase                                    |

Supplementary Table S9 Transcription factors in the genome of *A.alternata*.

| Gene ID    | Subfamily | Gene ID    | Subfamily       | Gene ID    | Subfamily | Gene ID    | Subfamily |
|------------|-----------|------------|-----------------|------------|-----------|------------|-----------|
| AALtg640   | ARID      | AALtg5836  | HTH_psq         | AALtg6166  | Zn_clus   | AALtg193   | Zn_clus   |
| AALtg5157  | ARID      | AALtg11698 | HTH_psq         | AALtg5549  | Zn_clus   | AALtg3026  | Zn_clus   |
| AALtg2163  | ARID      | AALtg10904 | KilA-N          | AALtg962   | Zn_clus   | AALtg10925 | Zn_clus   |
| AALtg497   | AT_hook   | AALtg34    | KilA-N          | AALtg8907  | Zn_clus   | AALtg3444  | Zn_clus   |
| AALtg912   | bZIP_1    | AALtg11863 | Myb_DNA-binding | AALtg7025  | Zn_clus   | AALtg968   | Zn_clus   |
| AALtg6125  | bZIP_1    | AALtg4660  | Myb_DNA-binding | AALtg9417  | Zn_clus   | AALtg5383  | Zn_clus   |
| AALtg3227  | bZIP_1    | AALtg7341  | Myb_DNA-binding | AALtg4691  | Zn_clus   | AALtg10980 | Zn_clus   |
| AALtg9614  | bZIP_1    | AALtg4949  | Myb_DNA-binding | AALtg8967  | Zn_clus   | AALtg8016  | Zn_clus   |
| AALtg7253  | bZIP_1    | AALtg1813  | Myb_DNA-binding | AALtg8890  | Zn_clus   | AALtg7121  | Zn_clus   |
| AALtg3816  | bZIP_1    | AALtg12028 | Myb_DNA-binding | AALtg9074  | Zn_clus   | AALtg3883  | Zn_clus   |
| AALtg5243  | bZIP_1    | AALtg135   | Myb_DNA-binding | AALtg9150  | Zn_clus   | AALtg10290 | Zn_clus   |
| AALtg6239  | bZIP_1    | AALtg8710  | Myb_DNA-binding | AALtg8164  | Zn_clus   | AALtg9979  | Zn_clus   |
| AALtg10928 | bZIP_1    | AALtg4507  | Myb_DNA-binding | AALtg597   | Zn_clus   | AALtg11686 | Zn_clus   |
| AALtg1854  | bZIP_1    | AALtg134   | Myb_DNA-binding | AALtg11415 | Zn_clus   | AALtg2676  | Zn_clus   |
| AALtg7239  | bZIP_1    | AALtg4214  | Myb_DNA-binding | AALtg3007  | Zn_clus   | AALtg2093  | Zn_clus   |
| AALtg5000  | bZIP_1    | AALtg4207  | Myb_DNA-binding | AALtg12014 | Zn_clus   | AALtg483   | Zn_clus   |
| AALtg11016 | bZIP_1    | AALtg6153  | NDT80_PhoG      | AALtg331   | Zn_clus   | AALtg2353  | Zn_clus   |
| AALtg5461  | bZIP_1    | AALtg4760  | NDT80_PhoG      | AALtg2025  | Zn_clus   | AALtg5912  | Zn_clus   |
| AALtg9986  | bZIP_1    | AALtg10851 | RFX_DNA_binding | AALtg8206  | Zn_clus   | AALtg6005  | Zn_clus   |
| AALtg12013 | CENP-B_N  | AALtg5670  | SRF-TF          | AALtg6118  | Zn_clus   | AALtg10943 | Zn_clus   |
| AALtg3278  | CENP-B_N  | AALtg3655  | SRF-TF          | AALtg3400  | Zn_clus   | AALtg1223  | Zn_clus   |
| AALtg6265  | CP2       | AALtg11081 | zf-C2H2         | AALtg9105  | Zn_clus   | AALtg2303  | Zn_clus   |
| AALtg10545 | Fork_head | AALtg925   | zf-C2H2         | AALtg3145  | Zn_clus   | AALtg7896  | Zn_clus   |
| AALtg8403  | Fork_head | AALtg2998  | zf-C2H2         | AALtg1363  | Zn_clus   | AALtg8898  | Zn_clus   |

---

|            |           |            |         |            |         |            |         |
|------------|-----------|------------|---------|------------|---------|------------|---------|
| AALtg3380  | Fork_head | AALtg8855  | zf-C2H2 | AALtg5016  | Zn_clus | AALtg1404  | Zn_clus |
| AALtg3730  | Fork_head | AALtg3586  | zf-C2H2 | AALtg11091 | Zn_clus | AALtg8266  | Zn_clus |
| AALtg4320  | GATA      | AALtg8208  | zf-C2H2 | AALtg11405 | Zn_clus | AALtg6414  | Zn_clus |
| AALtg5596  | GATA      | AALtg11864 | zf-C2H2 | AALtg7922  | Zn_clus | AALtg11974 | Zn_clus |
| AALtg8326  | GATA      | AALtg9410  | zf-C2H2 | AALtg3166  | Zn_clus | AALtg4807  | Zn_clus |
| AALtg9258  | GATA      | AALtg11124 | zf-C2H2 | AALtg5733  | Zn_clus | AALtg8375  | Zn_clus |
| AALtg5872  | GATA      | AALtg8118  | zf-C2H2 | AALtg10394 | Zn_clus | AALtg8483  | Zn_clus |
| AALtg11365 | GATA      | AALtg1605  | zf-C2H2 | AALtg10972 | Zn_clus | AALtg11263 | Zn_clus |
| AALtg9677  | GATA      | AALtg4467  | zf-C2H2 | AALtg6529  | Zn_clus | AALtg8538  | Zn_clus |
| AALtg8249  | HLH       | AALtg8698  | zf-C2H2 | AALtg4795  | Zn_clus | AALtg8172  | Zn_clus |
| AALtg7890  | HLH       | AALtg6851  | zf-C2H2 | AALtg127   | Zn_clus | AALtg4441  | Zn_clus |
| AALtg5726  | HLH       | AALtg4823  | zf-C2H2 | AALtg10806 | Zn_clus | AALtg10688 | Zn_clus |
| AALtg11151 | HLH       | AALtg5513  | zf-C2H2 | AALtg7641  | Zn_clus | AALtg5939  | Zn_clus |
| AALtg7108  | HLH       | AALtg9430  | zf-C2H2 | AALtg9816  | Zn_clus | AALtg9541  | Zn_clus |
| AALtg9883  | HLH       | AALtg10348 | zf-C2H2 | AALtg7249  | Zn_clus | AALtg11283 | Zn_clus |
| AALtg4560  | HLH       | AALtg4312  | zf-C2H2 | AALtg4438  | Zn_clus | AALtg9129  | Zn_clus |
| AALtg9274  | HLH       | AALtg6755  | zf-C2H2 | AALtg7586  | Zn_clus | AALtg8822  | Zn_clus |
| AALtg4433  | HLH       | AALtg9740  | zf-C2H2 | AALtg7282  | Zn_clus | AALtg8613  | Zn_clus |
| AALtg9188  | HLH       | AALtg8241  | zf-C2H2 | AALtg9163  | Zn_clus | AALtg11861 | Zn_clus |
| AALtg8325  | HLH       | AALtg5113  | zf-C2H2 | AALtg10558 | Zn_clus | AALtg8635  | Zn_clus |
| AALtg1832  | HLH       | AALtg1011  | zf-C2H2 | AALtg8265  | Zn_clus | AALtg10251 | Zn_clus |
| AALtg3713  | HMG_box   | AALtg2857  | zf-C2H2 | AALtg2310  | Zn_clus | AALtg8267  | Zn_clus |
| AALtg10579 | HMG_box   | AALtg10284 | zf-C2H2 | AALtg1190  | Zn_clus | AALtg7084  | Zn_clus |
| AALtg9435  | HMG_box   | AALtg1296  | zf-C2H2 | AALtg9284  | Zn_clus | AALtg2685  | Zn_clus |
| AALtg5202  | HMG_box   | AALtg10527 | zf-C2H2 | AALtg1721  | Zn_clus | AALtg9841  | Zn_clus |
| AALtg9267  | HMG_box   | AALtg10200 | zf-C2H2 | AALtg7682  | Zn_clus | AALtg1569  | Zn_clus |

---

---

|            |              |            |         |            |         |            |         |
|------------|--------------|------------|---------|------------|---------|------------|---------|
| AALtg11859 | HMG_box      | AALtg65    | zf-C2H2 | AALtg7476  | Zn_clus | AALtg9629  | Zn_clus |
| AALtg11926 | HMG_box      | AALtg11938 | zf-C2H2 | AALtg6057  | Zn_clus | AALtg1405  | Zn_clus |
| AALtg5429  | HMG_box      | AALtg7015  | zf-C2H2 | AALtg11931 | Zn_clus | AALtg4236  | Zn_clus |
| AALtg2977  | Homeobox     | AALtg3874  | zf-C2H2 | AALtg11754 | Zn_clus | AALtg7148  | Zn_clus |
| AALtg10699 | Homeobox     | AALtg561   | zf-C2H2 | AALtg2810  | Zn_clus | AALtg1514  | Zn_clus |
| AALtg9443  | Homeobox     | AALtg9029  | zf-C2H2 | AALtg8539  | Zn_clus | AALtg1947  | Zn_clus |
| AALtg6581  | Homeobox     | AALtg4096  | zf-C2H2 | AALtg8816  | Zn_clus | AALtg11210 | Zn_clus |
| AALtg24    | Homeobox     | AALtg6703  | zf-C2H2 | AALtg3664  | Zn_clus | AALtg8380  | Zn_clus |
| AALtg785   | Homeobox     | AALtg6557  | zf-C2H2 | AALtg1072  | Zn_clus | AALtg9167  | Zn_clus |
| AALtg3476  | Homeobox     | AALtg4     | zf-C2H2 | AALtg7392  | Zn_clus | AALtg9821  | Zn_clus |
| AALtg6758  | Homeobox     | AALtg11727 | zf-C2H2 | AALtg8318  | Zn_clus | AALtg8290  | Zn_clus |
| AALtg8622  | HSF_DNA-bind | AALtg2519  | zf-C2H2 | AALtg7054  | Zn_clus | AALtg10177 | Zn_clus |
| AALtg6971  | HSF_DNA-bind | AALtg7495  | zf-C2H2 | AALtg177   | Zn_clus | AALtg3102  | Zn_clus |
| AALtg4838  | HSF_DNA-bind | AALtg1236  | zf-C2H2 | AALtg2847  | Zn_clus | AALtg9458  | Zn_clus |
| AALtg3490  | HTH_psq      | AALtg3995  | zf-C2H2 | AALtg6558  | Zn_clus | AALtg2686  | Zn_clus |
| AALtg3772  | HTH_psq      | AALtg11041 | zf-C2H2 | AALtg5614  | Zn_clus | AALtg7336  | Zn_clus |
| AALtg2441  | HTH_psq      | AALtg3702  | zf-C2H2 | AALtg5909  | Zn_clus | AALtg4183  | Zn_clus |
| AALtg11742 | HTH_psq      | AALtg9572  | zf-C2H2 | AALtg6334  | Zn_clus | AALtg303   | Zn_clus |
| AALtg11054 | HTH_psq      | AALtg5661  | Zn_clus | AALtg8531  | Zn_clus | AALtg9231  | Zn_clus |
| AALtg12029 | HTH_psq      | AALtg253   | Zn_clus | AALtg10254 | Zn_clus | AALtg57    | Zn_clus |
| AALtg12006 | HTH_psq      | AALtg1552  | Zn_clus | AALtg10137 | Zn_clus |            |         |

---

Supplementary Table S10 Differentially expressed genes encoding transcription factors.

| ID         | Subfamily       | log2FC | padj     | annotation                                             |
|------------|-----------------|--------|----------|--------------------------------------------------------|
| AALtg3444  | Zn_clus         | 2.77   | 5.51E-03 | transcription factor Cys6                              |
| AALtg7922  | Zn_clus         | 2.63   | 5.40E-04 | fungus specific transcription factor domain-containing |
| AALtg4441  | Zn_clus         | 2.36   | 3.65E-14 | zinc finger transcription factor 1                     |
| AALtg8375  | Zn_clus         | 2.04   | 1.53E-11 | C6 zinc finger domain                                  |
| AALtg2685  | Zn_clus         | 2.04   | 2.74E-03 | fungus specific transcription factor domain-containing |
| AALtg8380  | Zn_clus         | 1.87   | 1.11E-10 | c6 transcription                                       |
| AALtg1813  | Myb_DNA-binding | 1.63   | 6.83E-05 | MYB DNA-binding domain containing                      |
| AALtg6239  | bZIP_1          | 1.63   | 1.77E-09 | bzip transcription factor                              |
| AALtg3713  | HMG_box         | 1.56   | 1.14E-05 | hmg box                                                |
| AALtg7476  | Zn_clus         | 1.55   | 5.43E-03 | C6 transcription factor                                |
| AALtg912   | bZIP_1          | 1.49   | 6.12E-09 | AP1-like transcription factor                          |
| AALtg11151 | HLH             | 1.40   | 6.41E-05 | HLH transcription factor ( gamma)                      |
| AALtg8635  | Zn_clus         | 1.34   | 5.33E-03 | related to nitrate assimilation regulatory nirA        |
| AALtg5383  | Zn_clus         | 1.28   | 6.78E-06 | Transcription factor fungi                             |
| AALtg8016  | Zn_clus         | 1.15   | 4.65E-04 | fungus specific transcription factor domain containing |
| AALtg9105  | Zn_clus         | 1.09   | 1.07E-03 | C6 finger domain                                       |
| AALtg785   | Homeobox        | 1.09   | 3.62E-05 | homeobox and c2h2 transcription factor                 |
| AALtg8898  | Zn_clus         | 1.08   | 4.33E-04 | pathway-specific nitrogen regulator                    |
| AALtg8241  | zf-C2H2         | 1.03   | 2.49E-03 | Zinc finger C2H2-type                                  |
| AALtg5113  | zf-C2H2         | -1.03  | 9.80E-04 | DNA-binding creA                                       |
| AALtg8325  | HLH             | -1.10  | 3.16E-04 | sterol regulatory element binding Sre1                 |
| AALtg127   | Zn_clus         | -1.28  | 5.22E-03 | transcription factor cys6                              |
| AALtg6755  | zf-C2H2         | -1.32  | 6.61E-05 | transcription factor steA                              |
| AALtg2857  | zf-C2H2         | -1.52  | 4.49E-05 | c2h2 type zinc finger domain-containing                |

|            |                 |       |          |                                                   |
|------------|-----------------|-------|----------|---------------------------------------------------|
| AALTg9883  | HLH             | -1.68 | 4.03E-13 | transcription factor bhlh                         |
| AALTg8326  | GATA            | -1.74 | 4.15E-05 | GATA-type sexual development transcription factor |
| AALTg4507  | Myb_DNA-binding | -1.82 | 5.10E-04 | trichome differentiation GL1                      |
| AALTg10972 | Zn_clus         | -1.84 | 3.36E-07 | hypothetical protein PTT_10983                    |
| AALTg9231  | Zn_clus         | -1.99 | 2.12E-05 | hypothetical protein COCMIDRAFT_22048             |
| AALTg11054 | HTH_psq         | -2.07 | 3.00E-03 | transposase, partial                              |
| AALTg4207  | Myb_DNA-binding | -2.15 | 1.25E-05 | Myb-like DNA-binding domain                       |
| AALTg9274  | HLH             | -2.45 | 3.85E-29 | hypothetical protein COCSADRAFT_90297             |
| AALTg177   | Zn_clus         | -2.47 | 5.31E-14 | c6 transcription factor                           |

---

Supplementary Table S11 Differentially expressed genes encoding MFS and ABC transporters.

| ID         |       | log2FC | padj     | annotation                                                          |
|------------|-------|--------|----------|---------------------------------------------------------------------|
| AALTg1366  | 2.A.1 | 4.90   | 4.68E-52 | MSF membrane transporter                                            |
| AALTg8641  | 2.A.1 | 3.41   | 1.55E-11 | allantoin permease                                                  |
| AALTg9681  | 2.A.1 | 3.36   | 1.15E-37 | benomyl methotrexate resistance                                     |
| AALTg3878  | 2.A.1 | 3.36   | 2.66E-31 | general substrate transporter                                       |
| AALTg6186  | 2.A.1 | 3.34   | 7.56E-05 | citric acid biosynthesis transporter                                |
| AALTg1881  | 2.A.1 | 3.27   | 2.28E-20 | MFS general substrate transporter                                   |
| AALTg9513  | 2.A.1 | 3.11   | 8.55E-11 | multidrug resistance                                                |
| AALTg5693  | 2.A.1 | 2.83   | 2.33E-08 | Quinidine resistance 2                                              |
| AALTg3560  | 2.A.1 | 2.71   | 3.86E-27 | major facilitator superfamily transporter                           |
| AALTg6492  | 2.A.1 | 2.59   | 4.81E-04 | Major facilitator superfamily domain, general substrate transporter |
| AALTg4714  | 2.A.1 | 2.52   | 6.00E-09 | MFS general substrate transporter                                   |
| AALTg6207  | 2.A.1 | 2.46   | 2.38E-07 | MFS multidrug transporter                                           |
| AALTg3946  | 2.A.1 | 2.36   | 2.63E-22 | fructose facilitator                                                |
| AALTg2291  | 2.A.1 | 2.25   | 1.34E-07 | high-affinity nicotinic acid transporter                            |
| AALTg7156  | 2.A.1 | 2.21   | 6.56E-14 | mfs transporter                                                     |
| AALTg2599  | 2.A.1 | 2.19   | 5.85E-06 | pantothenate transporter                                            |
| AALTg10470 | 2.A.1 | 2.05   | 4.61E-05 | MFS multidrug transporter                                           |
| AALTg9286  | 2.A.1 | 2.01   | 5.02E-03 | retrograde regulation 2                                             |
| AALTg10961 | 2.A.1 | 1.96   | 9.28E-08 | MFS transporter                                                     |
| AALTg8610  | 2.A.1 | 1.82   | 2.30E-09 | MFS gliotoxin efflux transporter                                    |
| AALTg2816  | 2.A.1 | 1.82   | 3.62E-14 | major facilitator superfamily transporter                           |
| AALTg5813  | 2.A.1 | 1.77   | 3.00E-05 | MFS general substrate transporter                                   |
| AALTg4424  | 2.A.1 | 1.46   | 4.86E-07 | major facilitator superfamily transporter                           |
| AALTg3543  | 2.A.1 | 1.46   | 1.68E-05 | MFS general substrate transporter                                   |



|            |       |       |          |                                                                    |
|------------|-------|-------|----------|--------------------------------------------------------------------|
| AALtG2466  | 2.A.1 | 1.46  | 2.53E-07 | sugar transporter STL1                                             |
| AALtG11845 | 2.A.1 | 1.43  | 2.24E-04 | MFS monocarboxylate transporter                                    |
| AALtG9974  | 2.A.1 | 1.40  | 4.09E-03 | sugar transporter family                                           |
| AALtG1811  | 2.A.1 | 1.20  | 3.19E-04 | Major facilitator superfamily domain general substrate transporter |
| AALtG9261  | 2.A.1 | -1.14 | 3.87E-04 | sugar transporter                                                  |
| AALtG334   | 2.A.1 | -1.23 | 1.84E-04 | siderophore iron transporter mirB                                  |
| AALtG6793  | 2.A.1 | -1.55 | 8.26E-10 | high affinity glucose transporter RGT2                             |
| AALtG7487  | 2.A.1 | -1.61 | 2.21E-09 | MFS transporter                                                    |
| AALtG3424  | 2.A.1 | -1.65 | 4.85E-06 | glucose transporter rco-3                                          |
| AALtG5328  | 2.A.1 | -1.76 | 8.50E-08 | high affinity glucose transporter RGT2                             |
| AALtG5937  | 2.A.1 | -1.88 | 6.46E-12 | MFS monosaccharide transporter,                                    |
| AALtG7371  | 2.A.1 | -1.98 | 1.51E-13 | MFS multidrug transporter                                          |
| AALtG9765  | 2.A.1 | -1.98 | 6.27E-05 | major facilitator superfamily transporter                          |
| AALtG149   | 2.A.1 | -2.31 | 9.82E-05 | facilitated glucose transporter,                                   |
| AALtG1579  | 2.A.1 | -2.43 | 2.03E-06 | nitrate transporter crnA                                           |
| AALtG8701  | 2.A.1 | -2.82 | 6.75E-28 | hexose transporter                                                 |
| AALtG2286  | 2.A.1 | -2.88 | 6.55E-05 | glucose galactose transporter                                      |
| AALtG10971 | 2.A.1 | -3.22 | 2.32E-40 | MFS multidrug transporter                                          |
| AALtG8788  | 3.A.1 | 2.02  | 2.95E-15 | cytosolic Fe-S cluster assembly factor NBP35                       |
| AALtG8644  | 3.A.1 | 1.20  | 1.55E-04 | ATP-dependent permease MDL2                                        |
| AALtG7483  | 3.A.1 | 3.53  | 2.61E-40 | ABC transporter                                                    |
| AALtG6923  | 3.A.1 | 1.32  | 2.87E-06 | ATP-binding cassette glutathione S-conjugate transporter           |
| AALtG6773  | 3.A.1 | 1.72  | 4.46E-06 | abc transporter                                                    |
| AALtG2358  | 3.A.1 | 1.22  | 4.46E-05 | ABC transporter                                                    |
| AALtG2261  | 3.A.1 | 2.35  | 2.76E-18 | cytosolic Fe-S cluster assembling factor cfd1                      |
| AALtG2410  | 3.A.1 | -1.36 | 3.25E-04 | ABC transporter                                                    |

---

Supplementary Table S12 Differentially expressed genes encoding cytochrome P450s.

| ID         | log2FC | padj     | annotation                                |
|------------|--------|----------|-------------------------------------------|
| AALTg473   | 3.27   | 7.08E-04 | cytochrome P450                           |
| AALTg9998  | 3.23   | 2.83E-06 | hypothetical protein W97_01942            |
| AALTg5137  | 3.16   | 1.84E-14 | cytochrome P450 4A10                      |
| AALTg3134  | 2.19   | 5.98E-08 | pisatin demethylase                       |
| AALTg8160  | 1.21   | 7.97E-03 | benzoate 4-monooxygenase cytochrome P450  |
| AALTg366   | 1.10   | 2.46E-03 | cytochrome P450                           |
| AALTg11894 | -2.09  | 5.54E-05 | bifunctional P-450:NADPH-P450 reductase   |
| AALTg9357  | -1.75  | 7.79E-04 | phenylacetate hydroxylase                 |
| AALTg3330  | -1.32  | 5.41E-03 | benzoate 4-monooxygenase cytochrome P450, |
| AALTg7699  | -1.31  | 1.45E-07 | 14-alpha sterol demethylase Cyp51B        |
| AALTg7358  | -1.30  | 1.80E-06 | Cytochrome P450                           |
| AALTg8358  | -1.16  | 2.41E-03 | benzoate 4-monooxygenase cytochrome P450  |
| AALTg7620  | -1.07  | 1.50E-03 | Cytochrome P450                           |

Supplementary Table S13 Differentially expressed genes encoding heat shock proteins and ubiquitination related enzymes.

| ID         | log2FC | padj     | annotation                               |
|------------|--------|----------|------------------------------------------|
| AALTg1212  | -2.06  | 7.75E-16 | heat shock 90                            |
| AALTg4160  | -1.03  | 2.11E-05 | heat shock Hsp88                         |
| AALTg789   | -1.85  | 2.42E-12 | heat shock 70                            |
| AALTg4905  | 1.11   | 6.81E-04 | DNAJ domain containing                   |
| AALTg10836 | 2.96   | 3.24E-33 | DNAJ domain containing                   |
| AALTg2843  | 1.72   | 4.70E-10 | Heat shock                               |
| AALTg5344  | 1.47   | 3.03E-05 | Fe-S assembly co-chaperone               |
| AALTg5883  | 1.15   | 3.44E-04 | DnaJ domain containing protein           |
| AALTg6765  | -2.73  | 3.79E-35 | DNAJ heat shock family                   |
| AALTg11445 | -1.81  | 1.59E-14 | chaperone dnaJ                           |
| AALTg3254  | -1.31  | 6.20E-06 | DNAJ domain containing                   |
| AALTg3033  | -1.20  | 2.99E-06 | DNAJ domain containing                   |
| AALTg10536 | -2.06  | 2.69E-12 | 30 kDa heat shock                        |
| AALTg4088  | 4.23   | 3.43E-12 | chaperone heat shock Hsp12               |
| AALTg5164  | 4.00   | 7.13E-08 | chaperone heat shock Hsp12,              |
| AALTg6960  | 1.76   | 3.81E-03 | ubiquitin-conjugating enzyme E2 2-like   |
| AALTg4835  | 1.47   | 2.71E-09 | ubiquitin-conjugating enzyme             |
| AALTg10966 | 1.76   | 1.86E-13 | ubiquitin carboxyl-terminal hydrolase 14 |

Supplementary Table S14 Primers used in qRT-PCR Analysis.

| ID           | Sequence              |
|--------------|-----------------------|
| AALTg2809-F  | ATTGGTAGTGGAGGTATTGC  |
| AALTg2809-R  | GTATGCCTTTGCGTCTTT    |
| AALTg6701-F  | CTCCTTCCCGCCTCTAC     |
| AALTg6701-R  | CTGTCGTCGCCAATCGT     |
| AALTg10096-F | TTTTTCGGCACCATTTC     |
| AALTg10096-R | TGCTTCAGGAGCTTCAACT   |
| AALTg9320-F  | ACCCAGCCACCTTTGAG     |
| AALTg9320-R  | TAAGCCTGCGTCGTCCT     |
| AALTg3740-F  | TGCCTGGAACCTTTACCT    |
| AALTg3740-R  | TCCGACAAGACCACCTACT   |
| AALTg912-F   | CACTCGCTGGAGGCTTTA    |
| AALTg912-R   | TGTTGTGCCGACTTGACG    |
| AALTg8622-F  | GGACGCCATGCTGAACC     |
| AALTg8622-R  | TGGAACCGACGGGATAA     |
| AALTg10470-F | TCGCATTATACGCCTCCT    |
| AALTg10470-R | ACGAACGACCCGACCAT     |
| AALTg8644-F  | AACGGAGTCATTTCTATCGG  |
| AALTg8644-R  | CTGGCAGACCCTTGGTG     |
| AALTg2843-F  | ATCTGGTGGCTATGGACG    |
| AALTg2843-R  | GGAACCTTGATTGCCTTGCT  |
| AALTg5164-F  | TTCCGCAAAGATACCCA     |
| AALTg5164-R  | GTGACCCATTCCAAGAGC    |
| AALTg9933-F  | GACAAGGTCGTTACAACG    |
| AALTg9933-R  | CACCACCAGGAACGAAAA    |
| AALTg3416-F  | TCGCACCCATTTACAACC    |
| AALTg3416-R  | CCCAACTCCGCAGCAAC     |
| AALTg41-F    | CAGGAGTTCTGCCAGATTAA  |
| AALTg41-R    | TCAGGCTTCTTGGTGCTT    |
| AALTg4186-F  | CGTTCTCCGTCGTTCCC     |
| AALTg4186-R  | TTCCACCATCAATGAGTTCTT |
| AALTg8569-F  | ACACCACCCACGCAATC     |
| AALTg8569-R  | GCCGCATAACTCAGTCCTA   |
| AALTg177-F   | CAGCCATAACCAAGTCCCG   |
| AALTg177-R   | CAGGCGTCCAGAGCAGA     |
| AALTg11894-F | CCGCAGTGGGTATGACG     |
| AALTg11894-R | GGCAAGCACCAAGAGGG     |
| actin-F      | GCCTTCCGTCTTGGGTCT    |
| actin-R      | AGGGCGGTGATTTCTT      |
